# Supplementary material
Source: publisher figshare collection journal article supplement (https://acs.figshare.com/ndownloader/files/3618150)
Supplement: Supplementary file 1 [file 3618150]

## Sheet: Sheet1
KiNativ assays-HUH7 live cells treatments
Labeling Site Key
Lys1	Conserved Lysine 1
Lys2	Conserved Lysine 2
ATP Loop	ATP binding loop
ACT	Activation loop
ATP	ATP site in non-canonical kinase (e.g. lipid kinase)
Protein Kinase Domain	Other lysine within kinase domain, possibly not in ATP binding site
Other	Labeling of residue outside of the protein kinase domain, possibly not in ATP binding site
	>90% Inhibition
	75 - 90% Inhibition
	50 - 75% Inhibition
	35 - 50% Inhibition
	No change
	>100% Increase in signal
	Data points inhibited >35% not considered significant are left uncolored
Kinase	Sequence	Labeling Site	17 (1 uM)
ABL,ARG	LMTGDTYTAHAGAKFPIK	ACT	31.6
AMPKa1	IGHYILGDTLGVGTFGKVK	ATP Loop	-3.8
AMPKa1,AMPKa2	VAVKILNR	Lys1	-7.5
AMPKa1,AMPKa2	DLKPENVLLDAHMNAK	Lys2	-21.1
ATR	FYIMMCKPK	ATP	-18
ATR	KAGHHQTAYNALLNAGESR	Other	29.3
AurA	DIKPENLLLGSAGELK	Lys2	-45.4
AurA,AurB,AurC	GKFGNVYLAR	ATP Loop	-17.6
BRAF	DLKSNNIFLHEDLTVK	Lys2	-99.6
CaMK1a	LVAIKCIAK	Lys1	3.6
CaMK2a,CaMK2b,CaMK2d,CaMK2g	DLKPENLLLASK	Lys2	20.3
CaMK2d	IPTGQEYAAKIINTKK	Lys1	11.6
CaMK2d	IPTGQEYAAKIINTK	Lys1	9.1
CaMK2g	TSTQEYAAKIINTKK	Lys1	31.8
CaMK2g	TSTQEYAAKIINTK	Lys1	27.1
CaMK2g	KTSTQEYAAKIINTK	Lys1	24.3
CASK	ETGQQFAVKIVDVAK	Lys1	16
CDC2	KIRLESEEEGVPSTAIR	Lys1	8.9
CDC2	DLKPQNLLIDDKGTIK	Lys2	5
CDK10	DLKVSNLLMTDK	Lys2	59.3
CDK11,CDK8	DLKPANILVMGEGPER	Lys2	25.8
CDK2	NKLTGEVVALKK	Lys1	-5.7
CDK2	VLHRDLKPQNLLINTEGAIK	Lys2	29.3
CDK2	DLKPQNLLINTEGAIK	Lys2	-0.4
CDK5	DLKPQNLLINR	Lys2	-37.2
CDK5	NVLHRDLKPQNLLINR	Lys2	1.1
CDK6	DLKPQNILVTSSGQIK	Lys2	24.4
CDK7	DLKPNNLLLDENGVLK	Lys2	2.6
CDK9	DMKAANVLITR	Lys2	22.4
CHED	DIKCSNILLNNR	Lys2	38.1
CHED	DIKCSNILLNNRGQIK	Lys2	-55.4
CHK1	DIKPENLLLDER	Lys2	22.5
CHK1	LSKGDGLEFK	Other	-633.1
CHK2	DLKPENVLLSSQEEDCLIK	Lys2	-100.4
CK1a	DIKPDNFLMGIGR	Lys2	-1.9
CK1d,CK1e	DVKPDNFLMGLGKK	Lys2	39.1
CRK7	DIKCSNILLNNSGQIK	Lys2	40.3
CSK	VSDFGLTKEASSTQDTGK	ACT	16.6
CSK	VSDFGLTKEASSTQDTGKLPVK	ACT	-15
CSK	EASSTQDTGKLPVKWTAPEALR	ACT	-15.9
CSK	VSDFGLTKEASSTQDTGKLPVKWTAPEALR	ACT	-43.1
DNAPK	KGGSWIQEINVAEK	ATP	71.1
DNAPK	KGGSWIQEINVAEKNWYPR	ATP	68.1
DNAPK	EHPFLVKGGEDLR	ATP	-44.8
DNAPK	GHDEREHPFLVKGGEDLR	ATP	-44.9
eEF2K	YIKYNSNSGFVR	ATP	-99.1
EGFR	LLGAEEKEYHAEGGKVPIK	ACT	-15.5
EGFR	IPVAIKELR	Lys1	7.2
EGFR	GLWIPEGEKVKIPVAIKELR	Lys1	-5.2
EphA2	VLEDDPEATYTTSGGKIPIR	ACT	69.2
EphB4	FLEENSSDPTYTSSLGGKIPIR	ACT	75.4
Erk1	DLKPSNLLINTTCDLK	Lys2	-51.7
Erk1	YIHSANVLHRDLKPSNLLINTTCDLK	Lys2	-28.6
Erk5	DLKPSNLLVNENCELK	Lys2	-24.1
FER	TSVAVKTCKEDLPQELK	Lys1	-7.1
FES	LRADNTLVAVKSCR	Lys1	-21.4
FRAP	IQSIAPSLQVITSKQRPR	ATP	26.5
FYN,SRC,YES	QGAKFPIKWTAPEAALYGR	ACT	-14.6
GCN2 domain2	DLKPVNIFLDSDDHVK	Lys2	37
GSK3A	DIKPQNLLVDPDTAVLK	Lys2	-23.9
GSK3B	DIKPQNLLLDPDTAVLK	Lys2	-17.6
IKKa	DLKPENIVLQDVGGK	Lys2	-50.3
IKKb	DLKPENIVLQQGEQR	Lys2	-54.1
IKKe,TBK1	DIKPGNIMR	Lys2	17.7
ILK	WQGNDIVVKVLK	Lys1	-6.7
ILK	ISMADVKFSFQCPGR	Protein Kinase Domain	-0.1
IRAK1	AIQFLHQDSPSLIHGDIKSSNVLLDER	Lys2	-305
IRAK4	DIKSANILLDEAFTAK	Lys2	0.4
IRE1	DLKPHNILISMPNAHGK	Lys2	-9.9
JAK1 domain2	IGDFGLTKAIETDKEYYTVK	ACT	-25.7
JNK1,JNK2,JNK3	DLKPSNIVVK	Lys2	14.5
KHS1	NVHTGELAAVKIIK	Lys1	-10.3
KHS1	DIKGANILLTDHGDVKLADFGVAAK	Lys2	19.8
KHS1	DIKGANILLTDHGDVK	Lys2	-57.8
KHS2	NVNTGELAAIKVIK	Lys1	5.3
LATS1	DIKPDNILIDR	Lys2	-67.5
LATS2	VDTHALYAMKTLR	Lys1	-38.5
LKB1	DIKPGNLLLTTGGTLK	Lys2	15.1
LOK	DLKAGNVLMTLEGDIR	Lys2	19
MAP2K1	IMHRDVKPSNILVNSR	Lys2	16.6
MAP2K1,MAP2K2	DVKPSNILVNSR	Lys2	-13.7
MAP2K3	MCDFGISGYLVDSVAKTMDAGCKPYMAPER	ACT	-23.1
MAP2K4	LCDFGISGQLVDSIAKTR	ACT	-31.3
MAP2K4	DIKPSNILLDR	Lys2	-97.6
MAP2K6	MCDFGISGYLVDSVAKTIDAGCKPYMAPER	ACT	-54
MAP2K6	HVPSGQIMAVKR	Lys1	-49.4
MAP2K6	DVKPSNVLINALGQVK	Lys2	-1.5
MAP2K7	DVKPSNILLDER	Lys2	-88.4
MAP3K1	DVKGANLLIDSTGQR	Lys2	27
MAP3K2	VYLCYDVDTGRELAVKQVQFDPDSPETSKEVNALECEIQLLK	Lys1	28.2
MAP3K2,MAP3K3	DIKGANILR	Lys2	-42.2
MAP3K4	DIKGANIFLTSSGLIK	Lys2	77
MAP4K2 (GCK)	DTVTSELAAVKIVK	Lys1	88.3
MARK2	HILTGKEVAVKIIDKTQLNSSSLQK	Lys1	-0.2
MARK2	EVAVKIIDKTQLNSSSLQK	Lys1	-25.4
MARK2	FIVHRDLKAENLLLDADMNIK	Lys2	19.4
MARK2,MARK3	DLKAENLLLDADMNIK	Lys2	11.3
MARK3	EVAIKIIDKTQLNPTSLQK	Lys1	-18.5
MAST1,MAST2	DLKPDNLLITSMGHIK	Lys2	53.8
MAST2,MAST4	DLKPDNLLVTSMGHIK	Lys2	30.2
MAST3	DLKPDNLLITSLGHIK	Lys2	14.9
MASTL	GAFGKVYLGQK	ATP Loop	-31.4
MASTL	DLKPDNMLISNEGHIK	Lys2	-7.3
MELK	DLKPENLLFDEYHK	Lys2	-45.7
MET	DMYDKEYYSVHNK	ACT	-18.4
MLK3	DLKSNNILLLQPIESDDMEHK	Lys2	15
MPSK1	DLKPTNILLGDEGQPVLMDLGSMNQACIHVEGSR	Lys2	33.2
MSK1,MSK2 domain1	VLGTGAYGKVFLVR	ATP Loop	11.5
MST1	AIHKETGQIVAIKQVPVESDLQEIIK	Lys1	9.9
MST1	ETGQIVAIKQVPVESDLQEIIK	Lys1	8.9
MST1,MST2	DIKAGNILLNTEGHAK	Lys2	-18.2
MST1,MST2	IHRDIKAGNILLNTEGHAK	Lys2	-0.8
MST2	ESGQVVAIKQVPVESDLQEIIK	Lys1	5.3
MST3	DIKAANVLLSEHGEVK	Lys2	4.3
MST3	IHRDIKAANVLLSEHGEVK	Lys2	5
MST4	TQQVVAIKIIDLEEAEDEIEDIQQEITVLSQCDSSYVTK	Lys1	41.9
MST4,YSK1	DIKAANVLLSEQGDVK	Lys2	25.2
NDR1	DTGHVYAMKILR	Lys1	16.4
NDR1,NDR2	LSDFGLCTGLKK	ACT	-51.6
NDR2	DTGHIYAMKILR	Lys1	-35.6
NEK1	DIKSQNIFLTK	Lys2	-12.5
NEK3	SKNIFLTQNGK	ACT	-20.2
NEK4	DLKTQNVFLTR	Lys2	43.4
NEK6,NEK7	DIKPANVFITATGVVK	Lys2	-2.7
NEK6,NEK7	VMHRDIKPANVFITATGVVK	Lys2	6.9
NEK7	AACLLDGVPVALKK	Lys1	7.6
NEK9	DIKTLNIFLTK	Lys2	-4.9
NuaK1	DLKLENILLDDNCNIK	Lys2	20.5
OSR1,STLK3	DVKAGNILLGEDGSVQIADFGVSAFLATGGDITR	Lys2	57.3
p38a	DLKPSNLAVNEDCELK	Lys2	22.6
p38a	QELNKTIWEVPER	Protein Kinase Domain	-29
p38d,p38g	DLKPGNLAVNEDCELK	Lys2	13
p70S6K	DLKPENIMLNHQGHVK	Lys2	-109.6
p70S6K,p70S6Kb	GGYGKVFQVR	ATP Loop	-44.2
p70S6Kb	DLKPENIMLSSQGHIK	Lys2	-63.3
PAN3	VMDPTKILITGK	Protein Kinase Domain	-39.3
PCTAIRE2	DLKPQNLLINEKGELKLADFGLAR	Lys2	-9.1
PCTAIRE2	DLKPQNLLINEK	Lys2	-2.1
PCTAIRE2,PCTAIRE3	SKLTENLVALKEIR	Lys1	12
PEK	DLKPSNIFFTMDDVVK	Lys2	16.8
PHKg2	ATGHEFAVKIMEVTAER	Lys1	-18.1
PI4K2B	SEEPYGQLNPKWTK	ATP	16
PI4KA,PI4KAP2	SGTPMQSAAKAPYLAK	ATP	29.8
PI4KB	VPHTQAVVLNSKDK	ATP	-31.7
PI4KB	VPHTQAVVLNSKDKAPYLIYVEVLECENFDTTSVPARIPENR	ATP	-11.8
PIK3C3	TEDGGKYPVIFKHGDDLR	ATP	8.9
PIK3CB	VFGEDSVGVIFKNGDDLR	ATP	-11.6
PIK3CB	VFGEDSVGVIFKNGDDLRQDMLTLQMLR	ATP	14
PIP4K2A	AKELPTLKDNDFINEGQK	ATP	13.4
PIP4K2A,PIP4K2B	TVKHGAGAEISTVNPEQYSK	ATP	-76.1
PIP4K2C	VKELPTLKDMDFLNK	ATP	5.4
PIP4K2C	TLVIKEVSSEDIADMHSNLSNYHQYIVK	ATP	12.8
PIP5K3	GGKSGAAFYATEDDRFILK	ATP	-98.4
PITSLRE	DLKTSNLLLSHAGILK	Lys2	15.6
PKCa,PKCb	DLKLDNVMLDSEGHIK	Lys2	64.8
PKD1,PKD2	NIVHCDLKPENVLLASADPFPQVK	Lys2	9
PKD3	NIVHCDLKPENVLLASAEPFPQVK	Lys2	-19.8
PKN2	DLKLDNLLLDTEGFVK	Lys2	-99.7
PKR	DLKPSNIFLVDTK	Lys2	-13
PLK1	EVFAGKIVPK	Lys1	-55.1
PLK1	CFEISDADTKEVFAGKIVPK	Lys1	-37.2
PLK1	DLKLGNLFLNEDLEVK	Lys2	-14
PLK1	VIHRDLKLGNLFLNEDLEVK	Lys2	1.3
PLK1 like	CFEISDADNKVVFAGKIVPK	Lys1	-47.1
PRPK	FLSGLELVKQGAEAR	ATP Loop	22.9
RAF1	DMKSNNIFLHEGLTVK	Lys2	34.1
ROCK1	KLQLELNQER	Other	-28.8
ROCK1,ROCK2	DVKPDNMLLDK	Lys2	-1
RSK1 domain1	LTDFGLSKEAIDHEKK	ACT	-474.2
RSK1 domain2	DLKPSNILYVDESGNPECLR	Lys2	-27.6
RSK1,RSK2 domain1	DLKPENILLDEEGHIKLTDFGLSK	Lys2	-204.6
RSK1,RSK2,RSK3 domain1	DLKPENILLDEEGHIK	Lys2	-159.8
RSK2 domain1	LTDFGLSKESIDHEK	ACT	-309.3
RSK2 domain1	LTDFGLSKESIDHEKK	ACT	-412.8
RSK2 domain1	VLGQGSFGKVFLVK	ATP Loop	-70.9
RSK2 domain1	DLKPENILLDEEGHIKLTDFGLSKESIDHEK	Lys2	-125.3
RSK2 domain2	ATNMEFAVKIIDK	Lys1	4.1
RSK2 domain2	TVEYLHAQGVVHRDLKPSNILYVDESGNPESIR	Lys2	11.5
RSK2 domain2	DLKPSNILYVDESGNPESIR	Lys2	11.7
RSK2 domain2	SKRDPTEEIEILLR	Protein Kinase Domain	-50.6
RSKL1 domain1	VLGVIDKVLLVMDTR	Protein Kinase Domain	-93.7
SGK3	FYAVKVLQK	Lys1	-81.5
SGK3	IVYRDLKPENILLDSVGHVVLTDFGLCK	Lys2	-14.5
SLK	AQNKETSVLAAAKVIDTK	Lys1	-17.4
SLK	DLKAGNILFTLDGDIK	Lys2	-41.1
SLK	DLKAGNILFTLDGDIKLADFGVSAK	Lys2	-41.8
SMG1	DTVTIHSVGGTITILPTKTKPK	ATP	-15.7
smMLCK	QGIVHLDLKPENIMCVNK	Lys2	34.3
STLK5	YSVKVLPWLSPEVLQQNLQGYDAK	ACT	-86.8
TAK1	DLKPPNLLLVAGGTVLK	Lys2	2.5
TAK1	DLKPPNLLLVAGGTVLK	Lys2	8.8
TAO1,TAO3	DIKAGNILLTEPGQVK	Lys2	0.4
TAO2	DVKAGNILLSEPGLVK	Lys2	35.6
TBK1	TGDLFAIKVFNNISFLRPVDVQMR	Lys1	30.9
TLK1	YLNEIKPPIIHYDLKPGNILLVDGTACGEIK	Lys2	-45
ULK3	EVVAIKCVAK	Lys1	-43.5
ULK3	NISHLDLKPQNILLSSLEKPHLK	Lys2	-19.4
VRK2	MLDVLEYIHENEYVHGDIKAANLLLGYK	Lys2	40.4
Wee1	YIHSMSLVHMDIKPSNIFISR	Lys2	-10.9
Wnk1,Wnk2,Wnk3	DLKCDNIFITGPTGSVK	Lys2	15.3
Wnk1,Wnk2,Wnk4	IGDLGLATLKR	ACT	21.6
Wnk4	DLKCDNVFITGPTGSVK	Lys2	44.2
YANK3	DVKPDNILLDER	Lys2	12.2
ZAK	WISQDKEVAVKK	Lys1	13.8
ZC1/HGK,ZC2/TNIK,ZC3/MINK	DIKGQNVLLTENAEVK	Lys2	9.7
